Noname manuscript No.  
(will be inserted by the editor)

# Evolution of COVID-19 Pandemic in India

Ali Asad\* · Siddharth Srivastava · Mahendra K. Verma

Received: date / Accepted: date

**Abstract** A mathematical analysis of patterns for the evolution of COVID-19 cases is key to the development of reliable and robust predictive models potentially leading to efficient and effective governance against COVID-19. Towards this objective, we study and analyze the temporal growth pattern of COVID-19 infection and death counts in various states of India. Our analysis up to June 16, 2020 shows that several states (namely Maharashtra, Tamil Nadu, Delhi, Uttar Pradesh) have reached  $t^2$  power-law growth, while some others like Gujarat, Rajasthan, and Madhya Pradesh have reached linear growth. Karnataka and Kerala are exhibiting a second wave. In addition, we report that the death counts exhibit similar behaviour as the infection counts. These observations indicate that Indian states are far from flattening their epidemic curves.

**Keywords** COVID-19 · Epidemic spread · Power law growth

## 1 Introduction

COVID-19 pandemic has been impacting the life and economy across the globe since December 2019 and

has caused major disruptions [37]. As of June 2020, COVID-19 has infected nearly 10 million people across the globe with 85 countries in community transmission stage [38] leading to significant efforts towards control [28], modelling [2,6,12], search for a cure [19] for COVID-19 across the world and India [7,33]. Keeping this in mind, in this paper, we analyze the evolution of COVID-19 cases and deaths in various Indian states. Specifically, we study and model the temporal evolution of infection and death counts for various time intervals and analyze their variations.

At the onset of COVID-19 pandemic, India imposed the world's largest nationwide lockdown, starting from March 25, 2020 [18]. However, preparedness and impact of the lockdown varied across states depending upon past experiences such as Nipah virus in Kerala or Odisha's disaster response due to recent natural disasters [18,11]. Therefore, attempts have been made to study the impact of COVID-19 in India. Sardar et al. [29] mathematically assessed the impact of the first 21 days of the lockdown in terms of the total number of cases. Tomar et al. [35] employed deep learning to provide a 30 day forecast of the total, death, and recovered cases. Chatterjee et al. [6] provided estimates on the growth of cases using nonpharmacological interventions such as social distancing and lockdown. Network-based epidemic growth models have also been evolved for modelling COVID-19 pandemic [22].

Epidemiological models, e.g. SEIR model, are being evolved to suit the national conditions [4,10,17,20,24]. A model based on delay-differential equations considers the effects of past events [32]. Ranjan [27] showed the effects of various factors in dynamics of epidemic spread. Due to lack of ample historical data many models for studying COVID-19 are appearing everyday [9,

---

Ali Asad\*  
Department of Physics, Indian Institute of Technology Kanpur, Kanpur 208016, India  
E-mail: aliasad@iitk.ac.in

Siddharth Srivastava  
Centre for Development of Advanced Computing, Noida 201307, India

Mahendra K. Verma  
Department of Physics, Indian Institute of Technology Kanpur, Kanpur 208016, India  
Tel.: +512-2597396  
E-mail: mkv@iitk.ac.in

**NOTE: This preprint reports new research that has not been certified by peer review and should not be used to guide clinical practice.**

3,34,31]. However, none of them is able to model the epidemic pattern to sufficient accuracy [15].

Further, predictive models are based on studying the underlying patterns of data and encapsulate them as a function of time to predict the outcome. In fact, assuming that the data will follow a set pattern is at the core of many prevailing techniques [26,36]. However, in case of COVID-19, the patterns of COVID-19 cases also vary due to the extent of government measures [13,14].

Verma et al. [36] and Chatterjee et al. [8] analyzed infections counts of 21 leading countries. They observed emergence of power-laws after an initial exponential phase. They showed that China and South Korea followed power-law regimes— $t^2$ ,  $t$ ,  $\sqrt{t}$ — before flattening their epidemic curves. Also, the infection data for European countries (Spain, France, Italy, and Germany), USA, and Japan followed a power-law regime ( $t^n$ ,  $1 \leq n \leq 4$ ). They attributed this characteristic to long distance travel and asymptomatic carriers. They concluded that  $\sqrt{t}$  regime is a common feature between all infection curves which head towards saturation.

In this paper, we extend the works of Verma et al. [36] and Chatterjee et al. [8] to the most affected Indian states. We observe that some of the states have reached  $t^2$  growth phase, while some others have linear growth. Karnataka and Kerala are showing a second waves. These findings will be useful to the epidemic control panel. We discuss our results in Section 2 and conclude in Section 3.

## 2 Analysis and Results

In this paper, we analyze the covid-19 infection and death counts in nineteen Indian states: Maharashtra, Tamil Nadu, Delhi, Gujarat, Uttar Pradesh, Rajasthan, Madhya Pradesh, West Bengal, Karnataka, Bihar, Kerala. We combine the data of all the north-eastern (NE) states (Arunachal Pradesh, Assam, Manipur, Meghalaya, Mizoram, Nagaland, Sikkim, and Tripura) because the counts for each of them is rather small for any statistical analysis. The above states constitute more than 90% of total COVID-19 infections in India as of June 16, 2020. For our analysis, we employed the real-time data available at the website of *Ministry of Health and Family Welfare, Government of India* [23]. We have consolidated the data using the Application Programming Interface (APIs) from COVID-19 India Tracker [1].

For our analysis, we consider data till June 16, 2020. First, we perform a temporal evolution analysis of Infection count, which is denoted by  $I(t)$ , where  $t$  is time in days. In Fig. 1, we plot the time series of  $I(t)$  and its derivative  $\dot{I}(t)$  in semi-logy format using red and blue

curves respectively. The starting date, listed in Table 1, is chosen from the day the infection began to increase in the respective states.

Similarly, we studied the evolution of total death cases for six states that have reported a large number of deaths. The cumulative death cases are denoted by  $D(t)$ . The time series of  $D(t)$  and its derivative  $\dot{D}(t)$  are plotted in Fig. 2 in semi-logy using red and blue curves respectively. Also, the starting date (see Table 2) is considered from the day death counts begin to increase.

We employ exponential and polynomial functions to compute best-fit curves on different regions of  $I(t)$  and  $D(t)$  data. The time series for both  $I(t)$  and  $D(t)$  follow exponential regimes during the early phases of the pandemic and subsequently transition to power-law regimes. This is in accordance with earlier work of Verma et al. [36] and Chatterjee et al. [8]. The best-fit functions along with their relative errors are listed in Tables 1 and 2 for infected and death cases respectively.

In the beginning, all  $I(t)$  curves show exponential regime, denoted as  $I(t) = A_i \exp(\beta_i t)$ . Interestingly, the  $I(t)$  curve for Maharashtra, Delhi, Bihar, and North-East exhibit two exponential functions for the fits. For instance,  $I(t)$  curve of Maharashtra requires two functions,  $\exp(0.13t)$  and  $\exp(0.11t)$ .

The epidemic curves transition to power-laws after the exponential phase. We employ Python's *poly-fit* function to calculate the best-fit polynomials for these regions. In this region, a epidemic curve passes through a series of polynomials ( $t^3$ ,  $t^2$ ,  $t$ ). The  $I(t)$  curve for Tamil Nadu, Uttar Pradesh, and West Bengal exhibit a  $t^3$  followed by a  $t^2$  power-law region. It is worth mentioning that the  $I(t)$  curves of Gujarat, Rajasthan, Madhya Pradesh, and Bihar have entered a linear ( $t$ ) regime.

Interestingly, the curve of cumulative Infection count for Karnataka and Kerala exhibits a rise in  $\dot{I}(t)$  and a subsequent rise in  $I(t)$  in the last week of May 2020. This increase is preceded by a small region of linear growth or nearly a flattened curve which clearly indicates a second wave for the epidemic [5]. The emergence of this feature corresponds with relaxation in lockdowns and an increase in testing capacity. The best-fit curves for the second waves are function of  $\bar{t}$ , where  $\bar{t} = t - t_0$ . Here,  $t_0$  corresponds to the day from which the daily count shows an unprecedented rise after a region of decline.

Similar to the curves for Infection count, the  $D(t)$  curves begin with exponential regimes ( $D(t) = A_d \exp(\beta_d(t))$ ), and then transition to power-law regimes ( $t^3$ ,  $t^2$ ,  $t$ ). Interestingly, for many states the powers-laws for both  $I(t)$  and  $D(t)$  curves are qualitatively similar. For example, both  $I(t)$  and  $D(t)$  curves for Gujarat exhibit

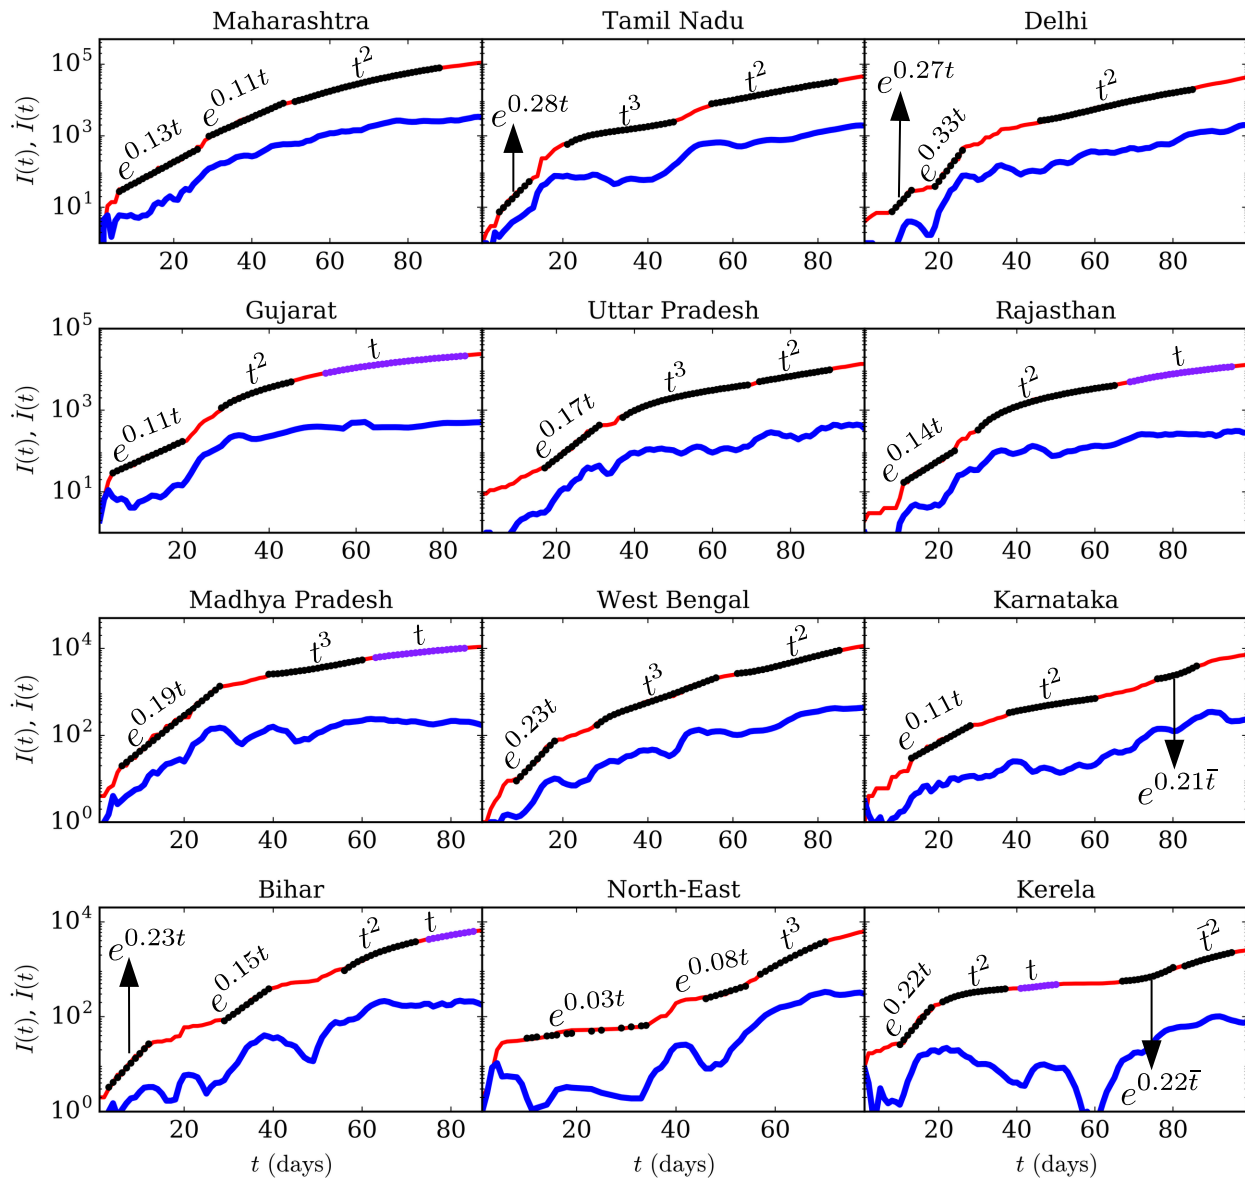

**Fig. 1** (color online) The *semi-log* plots of total infection count ( $I(t)$ ) vs. time ( $t$ ) (red thin curves) and  $\dot{I}(t)$  vs.  $t$  (blue thick curves) for the eleven states individually and consolidated for north-eastern Indian states. The dotted curves represent the best-fit curves. Refer Table 1 for the best-fit functions.

a  $t^2$  region followed by a linear phase ( $t$ ). This further substantiates the claims of Chatterjee et al. [8] that  $D(t)$  is proportional to  $I(t)$  statistically. This is because a fraction of infected population is susceptible to death.

The values of  $\beta_i$  and  $\beta_d$  represent the growth rates of infected and death cases, respectively. It must be noted that  $\beta_i$  and  $\beta_d$  depend on various factors such as immunity level, the average age of the population, population

density, local policy decisions (lockdowns, testing intensity, social distancing, healthcare facilities), etc.

In Fig. 1 and 2 we also plot daily infection and death counts, which are represented by  $\dot{I}(t)$  and  $\dot{D}(t)$  respectively. We calculate the derivative using Python's *gradient* function and take a 5-day moving average in order to smoothen the  $\dot{I}(t)$  and  $\dot{D}(t)$  curves. We observe that in the exponential regimes, the daily counts are proportional to the cumulative number of infected and death

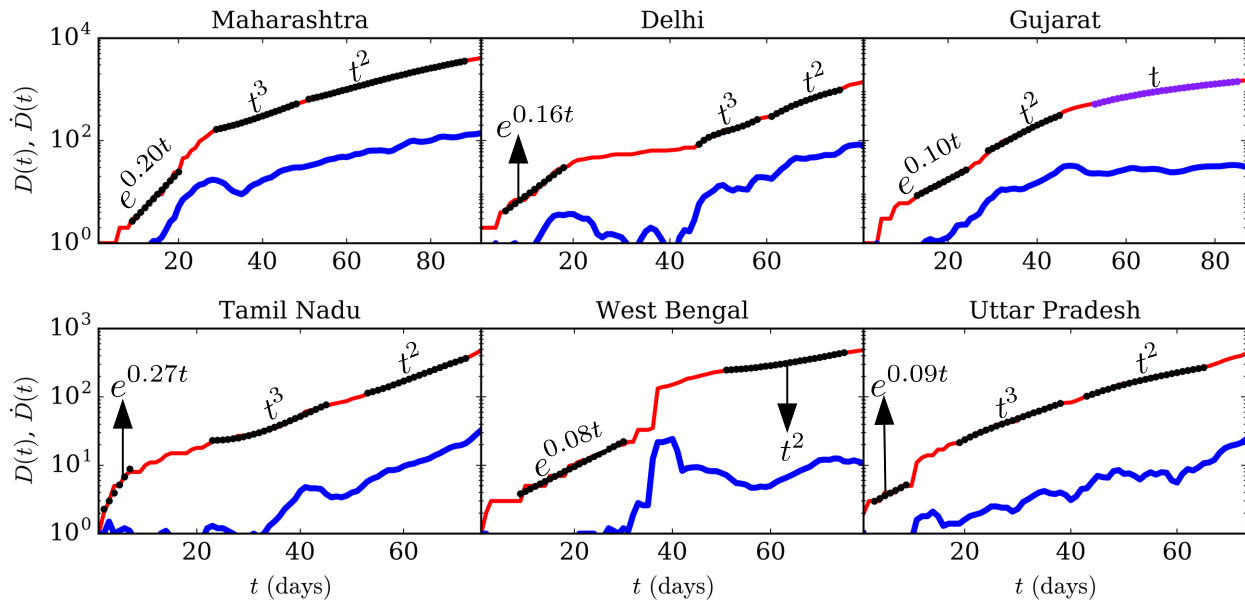

**Fig. 2** (color online) The *semi-log* plots of total death cases ( $D(t)$ ) vs. time ( $t$ ) (red thin curves) and  $\dot{D}(t)$  vs.  $t$  (blue thick curves) for six states of India. The dotted curves represent the best-fit curves (see Table 2).

cases i.e.  $\dot{I} \approx \beta_i I$  and  $\dot{D} \approx \beta_d D$ . Verma et al. [36] show that power-law regime can be approximated as  $I(t) \sim At^n$ , and hence,  $\dot{I} \sim I^{1-1/n}$ . Similarly, it can be shown that for power-laws  $\dot{D} \sim D^{1-1/n}$ . This shows that the daily counts are suppressed in the power-law region compared to the exponential phase. Note that in the linear growth regime,  $\dot{I} \approx \dot{D} \approx \text{constant}$ , implying a constant daily count. The daily count is expected to decrease after a linear regime, however, this may not be the case when a second wave emerges.

An interesting question is whether some Indian states having a lower number of COVID-19 cases are closer to saturation. To investigate this issue, we compute the infection time series for India without the three most widely affected states, which are Maharashtra, Tamil Nadu, and Delhi. We denote this time series as  $\bar{I}(t)$ , and it is computed as  $\bar{I}(t) = I(t)_{IND} - \{I(t)_{MH} + I(t)_{TN} + I(t)_{DL}\}$ . In Fig. 3, we plot  $\bar{I}(t)$  and  $\dot{\bar{I}}(t)$ , and compare them with the total  $I(t)$  and  $\dot{I}(t)$ . From the plots it is evident that both the plots exhibit exponential and power-law regimes (see Table 3), and that  $\bar{I}(t)$  and  $I(t)$  are proportional to each other. Although these states comprise of almost 30% of the total Infection count in India, their removal from total  $I(t)$  does not cause any behavioural change in the  $\bar{I}(t)$  curve. Based on these observations we conclude that almost all the affected states shown in Fig. 1 are following similar epidemic evolution.

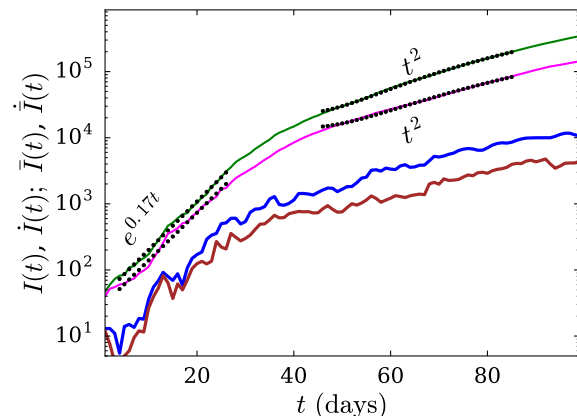

**Fig. 3** (color online) The *semi-log* plot of total Infection count ( $I(t)$ ) vs. time ( $t$ ) curves for India (green curve) and India other than Maharashtra, Tamil Nadu and Delhi (magenta curve) where,  $\bar{I}(t) = I(t)_{India} - \{I(t)_{MH} + I(t)_{TN} + I(t)_{DL}\}$ . The thick blue and brown curves in the plot depict the derivatives of  $I(t)$  and  $\bar{I}(t)$  respectively. The dotted curves represent the best-fit curves.

We can summarize the findings of the state-wise epidemic study as follows. Most of the Indian states have reached up to  $t^2$  part of the epidemic evolution, while some others have reached the linear regime ( $I(t) \sim t$ ). Kerala and Karnataka are observing a second wave of the epidemic. The overall count in India has reached  $t^2$ . These observations indicate that we are far from saturation or flattening of the epidemic curve.

**Table 1** Best-fit functions for the total infections and the corresponding relative errors for major Indian states. The order of the functions for respective states correspond to the best-fit curves marked on  $I(t)$  of Fig 1.

| States (Start Date)       | Best-fit functions and errors on $I(t)$                                                                                                                                                                   |
|---------------------------|-----------------------------------------------------------------------------------------------------------------------------------------------------------------------------------------------------------|
| Maharashtra (March 10)    | 1) $12e^{0.13t}$ ( $\pm 6.9\%$ )<br>2) $38e^{0.11t}$ ( $\pm 4.7\%$ )<br>3) $33t^2 - 2700t + 61000$ ( $\pm 1.5\%$ )                                                                                        |
| Tamil Nadu (March 18)     | 1) $1.9e^{0.28t}$ ( $\pm 7.3\%$ )<br>2) $0.15t^3 - 15t^2 + 530t - 5400$ ( $\pm 2.0\%$ )<br>3) $18t^2 - 1700t + 45000$ ( $\pm 1.7\%$ )                                                                     |
| Delhi (March 10)          | 1) $0.8e^{0.27t}$ ( $\pm 5.7\%$ )<br>2) $0.07e^{0.33t}$ ( $\pm 10.0\%$ )<br>3) $9t^2 - 780t + 19000$ ( $\pm 3.7\%$ )                                                                                      |
| Gujarat (March 20)        | 1) $19e^{0.11t}$ ( $\pm 4.3\%$ )<br>2) $3t^2 + 8.6t - 1700$ ( $\pm 3.0\%$ )<br>3) $420t - 14000$ ( $\pm 1.1\%$ )                                                                                          |
| Uttar Pradesh (March 10)  | 1) $2.1e^{0.17t}$ ( $\pm 6.8\%$ )<br>2) $0.01t^3 - 1.7t^2 + 180t - 4400$ ( $\pm 1.5\%$ )<br>3) $4t^2 - 390t - 12000$ ( $\pm 1.6\%$ )                                                                      |
| Rajasthan (March 10)      | 1) $3.8e^{0.14t}$ ( $\pm 7.0\%$ )<br>2) $0.55t^2 + 54t - 1800$ ( $\pm 2.6\%$ )<br>3) $260t - 13000$ ( $\pm 0.57\%$ )                                                                                      |
| Madhya Pradesh (March 21) | 1) $6.3e^{0.19t}$ ( $\pm 9.7\%$ )<br>2) $4.7t^2 - 330t + 8300$ ( $\pm 1.6\%$ )<br>3) $200t - 6400$ ( $\pm 0.41\%$ )                                                                                       |
| West Bengal (March 18)    | 1) $1.1e^{0.23t}$ ( $\pm 7.2\%$ )<br>2) $0.1t^3 - 9t^2 + 330t - 3900$ ( $\pm 4.8\%$ )<br>3) $9t^2 - 1100t + 33000$ ( $\pm 1.0\%$ )                                                                        |
| Karnataka (March 10)      | 1) $6.5e^{0.11t}$ ( $\pm 6.5\%$ )<br>2) $0.1t^2 + 9.7t - 140$ ( $\pm 1.2\%$ )<br>3) $220e^{0.21t}$ ( $\pm 6.9\%$ )                                                                                        |
| Bihar (March 22)          | 1) $1.6e^{0.23t}$ ( $\pm 9.0\%$ )<br>2) $0.9e^{0.15t}$ ( $\pm 3.2\%$ )<br>3) $0.87t^2 + 69t - 5700$ ( $\pm 2.9\%$ )<br>4) $3800t - 45000$ ( $\pm 0.84\%$ )                                                |
| Kerala (March 10)         | 1) $2.8e^{0.22t}$ ( $\pm 8.0\%$ )<br>2) $0.02t^3 - 2.3t^2 + 92t - 900$ ( $\pm 1.0\%$ )<br>3) $9.3t + 14$ ( $\pm 0.81\%$ )<br>4) $27e^{0.22t}$ ( $\pm 7.8\%$ )<br>5) $0.71t^2 + 58t - 550$ ( $\pm 1.8\%$ ) |
| North East (March 10)     | 1) $28e^{0.03t}$ ( $\pm 6.6\%$ )<br>2) $7e^{0.08t}$ ( $\pm 4.1\%$ )<br>3) $0.14t^3 - 16t^2 + 600t - 6400$ ( $\pm 2.1\%$ )                                                                                 |

We conclude in the next section.

### 3 Discussions and Conclusions

In this paper, we analyzed the cumulative infection and death counts of COVID-19 epidemic in most-affected states of India. The respective time series,  $I(t)$  and  $D(t)$ , exhibit exponential and power-law growth in the epidemic. The most affected states, Maharashtra, Tamil

**Table 2** Best-fit functions for the death cases and corresponding relative errors for major Indian states. The order of the functions for respective states correspond to the best-fit curves on  $D(t)$  of Fig 2.

| States (Start Date)      | Best-fit functions and errors on $D(t)$                                                                                                |
|--------------------------|----------------------------------------------------------------------------------------------------------------------------------------|
| Maharashtra (March 17)   | 1) $0.44e^{0.20t}$ ( $\pm 6.4\%$ )<br>2) $0.02t^3 - 1.1t^2 + 30t - 170$ ( $\pm 1.1\%$ )<br>3) $1.4t^2 - 120t + 3000$ ( $\pm 1.3\%$ )   |
| Delhi (March 29)         | 1) $1.6e^{0.16t}$ ( $\pm 9.6\%$ )<br>2) $0.13t^3 - 20t^2 + 1000t - 17000$ ( $\pm 2.9\%$ )<br>3) $0.57t^2 - 30t - 22$ ( $\pm 1.6\%$ )   |
| Gujarat (March 22)       | 1) $2.2e^{0.10t}$ ( $\pm 4.1\%$ )<br>2) $0.6t^2 - 29t + 400$ ( $\pm 3.3\%$ )<br>3) $28t - 970$ ( $\pm 0.98\%$ )                        |
| Tamil Nadu (April 03)    | 1) $1.7e^{0.27t}$ ( $\pm 8.9\%$ )<br>2) $0.002t^3 - 0.01t^2 + 0.96t + 25$ ( $\pm 2.9\%$ )<br>3) $0.43t^2 - 41t + 1100$ ( $\pm 1.0\%$ ) |
| West Bengal (March 30)   | 1) $1.8e^{0.08t}$ ( $\pm 8.6\%$ )<br>2) $0.24t^2 - 23t + 780$ ( $\pm 0.64\%$ )                                                         |
| Uttar Pradesh (April 04) | 1) $2.1e^{0.17t}$ ( $\pm 5.5\%$ )<br>2) $0.003t^3 - 0.2t^2 + 6.2t - 48$ ( $\pm 2.6\%$ )<br>3) $0.03t^2 + 3.7t - 120$ ( $\pm 1.8\%$ )   |

**Table 3** The best-fit functions for cumulative cases and the respective relative errors for various stages of evolution shown in Fig. 3.

| Cases                     | Best-fit functions and errors                                                           |
|---------------------------|-----------------------------------------------------------------------------------------|
| India: Case-I (Fig.3(a))  | 1) $37e^{0.17t}$ ( $\pm 6.5\%$ )<br>2) $92t^2 - 7700t + 18 \times 10^4$ ( $\pm 1.4\%$ ) |
| India: Case-II (Fig.3(b)) | 1) $26e^{0.17t}$ ( $\pm 9.5\%$ )<br>2) $37t^2 - 3200t + 82000$ ( $\pm 2.6\%$ )          |

Nadu, and Delhi, exhibit  $t^2$  growth. However, Gujarat, Rajasthan, Madhya Pradesh, and Bihar exhibit linear growth. Karnataka and Kerala show second wave because they have another exponential phase of growth now. We also remark the epidemic in India has grown alarmingly after lifting of the lockdown. Note that the lifting of lockdown is expected to increase the social contacts, and hence the epidemic growth.

Regarding the death count, Maharashtra, Delhi, Tamil Nadu, West Bengal, and Uttar Pradesh exhibit  $t^2$  growth. However, Gujarat exhibits a linear growth. These observations show that the death rate and infection rate are nearly proportional to each other, consistent with earlier observation of Chatterjee et al. [8]. We also observe that at present, the infection count in the whole country is increasing as  $t^2$ . These observations indicate that we are far from the flattening of the epidemic curve.

The above trend of epidemic evolution in Indian states is consistent with the evolution in various nations

of the world [36,8]. The authors have shown that before flattening, the epidemic curves pass through  $t^2$ ,  $t$ , and  $\sqrt{t}$  evolution. Hence, the epidemic curves for most Indian states have to reach  $t$  and  $\sqrt{t}$  before flattening of the curve. It indicates that we are some distance away from the saturation of the epidemic.

Kim [16] showed that the COVID-19 epidemic of various nations converges into a single universal curve. This observation may be very useful in predicting when India will reach saturation. We plan to compare the appropriately normalized Indian curves with the universal epidemic curve, and then attempt to forecast the flattening of the curve. In addition to the above strategy, the gaussian model of Schüttler et al. [30] too may help us forecast the epidemic evolution and flattening.

The present work is based on data analytics, rather than focussing on specific epidemic models that have been quite successful in forecasting the epidemic evolution [25,20,21]. Note, however, that the epidemic models involve many free parameters that lead to ambiguities and difficulties in the forecasting of the epidemic evolution. Our focus on data analytics is due to the latter reason. Our work shows that the power laws in the epidemic curves indicate the stage of the epidemic evolution. This feature may help in forecasting the flattening of the curve.

**Acknowledgements** The authors thank Soumyadeep Chatterjee and Shashwat Bhattacharya for their help in early works. We also thank Shayak Bhattacharya, Prateek Sharma, and Anurag Gupta for useful discussions. Ali Asad is supported by Indo-French (CEFIPRA) project 6104-1.

## References

1. Covid19 india tracker. URL <https://coronaindia.github.io>
2. Barkur, G., Vibha, G.B.K.: Sentiment analysis of nationwide lockdown due to covid 19 outbreak: Evidence from india. *Asian journal of psychiatry* (2020)
3. Bhardwaj, R.: A predictive model for the evolution of covid-19. *Transactions of the Indian National Academy of Engineering* (2020). DOI 10.1007/s41403-020-00130-w. URL <https://doi.org/10.1007/s41403-020-00130-w>
4. Bjørnstad, O.N.: *Epidemics: Models and Data using R*. Springer (2018)
5. de Castro, F.: Modelling of the second (and subsequent) waves of the coronavirus epidemic. *spain and germany as case studies*. medRxiv (2020). DOI 10.1101/2020.06.12.20129429. URL <https://www.medrxiv.org/content/early/2020/06/13/2020.06.12.20129429>
6. Chatterjee, K., Chatterjee, K., Kumar, A., Shankar, S.: Healthcare impact of covid-19 epidemic in india: A stochastic mathematical model. *Medical Journal Armed Forces India* (2020)
7. Chatterjee, P., Nagi, N., Agarwal, A., Das, B., Banerjee, S., Sarkar, S., Gupta, N., Gangakhedkar, R.R., et al.: The 2019 novel coronavirus disease (covid-19) pandemic: A review of the current evidence. *Indian Journal of Medical Research* **151**(2), 147 (2020)
8. Chatterjee, S., Shayak, B., Asad, A., Bhattacharya, S., Alam, S., Verma, M.K.: Evolution of covid-19 pandemic: Power law growth and saturation. medRxiv (2020). DOI 10.1101/2020.05.05.20091389. URL <https://bit.ly/31jd9LO>
9. Chauhan, P., Kumar, A., Jamdagni, P.: Regression analysis of covid-19 spread in india and its different states. medRxiv (2020). DOI 10.1101/2020.05.29.20117069. URL <https://www.medrxiv.org/content/early/2020/05/29/2020.05.29.20117069>
10. Daley, D.J., Gani, J.: *Epidemic Modelling: An Introduction*. Cambridge University Press (2001)
11. Dore, B.: Covid-19: collateral damage of lockdown in india. *BMJ* **369** (2020)
12. Giordano, G., Blanchini, F., Bruno, R., Colaneri, P., Di Filippo, A., Di Matteo, A., Colaneri, M.: Modelling the covid-19 epidemic and implementation of population-wide interventions in italy. *Nature Medicine* pp. 1–6 (2020)
13. Hale, T., Petherick, A., Phillips, T., Webster, S.: Variation in government responses to covid-19. *Blavatnik school of government working paper* **31** (2020)
14. Hale, T., Webster, S., Petherick, A., Phillips, T., Kira, B.: Oxford covid-19 government response tracker. *Blavatnik School of Government* **25** (2020)
15. Holmdahl, I., Buckee, C.: Wrong but useful what covid-19 epidemiologic models can and cannot tell us. *New England Journal of Medicine* (2020)
16. Kim, A.S.: Transformed time series analysis of first-wave covid-19: universal similarities found in the group of twenty (g20) countries. medRxiv (2020). DOI 10.1101/2020.06.11.20128991. URL <https://www.medrxiv.org/content/early/2020/06/14/2020.06.11.20128991>
17. Labadin, J., Hong, B.H.: Transmission Dynamics of 2019-nCoV in Malaysia. medrxiv.org (doi: 10.1101/2020.02.07.20021188) (2020)
18. Lancet, T.: India under covid-19 lockdown. *Lancet (London, England)* **395**(10233), 1315 (2020)
19. Le, T.T., Andreadakis, Z., Kumar, A., Roman, R.G., Tollefsen, S., Saville, M., Mayhew, S.: The covid-19 vaccine development landscape. *Nat Rev Drug Discov* **19**(5), 305–306 (2020)
20. López, L.R., Rodo, X.: A modified SEIR model to predict the COVID-19 outbreak in Spain and Italy: simulating control scenarios and multi-scale epidemics. medarxiv.org (doi: 10.1101/2020.03.27.20045005) (2020)
21. Mandal, S., Bhatnagar, T., Arinaminpathy, N., Agarwal, A., Chowdhury, A., Murhekar, M., Gangakhedkar, R., Sarkar, S.: Prudent public health intervention strategies to control the coronavirus disease 2019 transmission in India: A mathematical model-based approach. *Indian Journal of Medical Research (preprint)* (2020)
22. Marathe, M., Vullikanti, A.K.S.: Computational epidemiology. *Commun. ACM* **56**(7), 88–96 (2013)
23. Ministry of Health and Family Welfare, Govt. of India: URL <https://www.mohfw.gov.in/>
24. Peng, L., Yang, W., Zhang, D., Zhuge, C., Hong, L.: Epidemic analysis of COVID-19 in China by dynamical modeling. arXiv.org (2020)
25. Peng, L., Yang, W., Zhang, D., Zhuge, C., Hong, L.: Epidemic analysis of COVID-19 in China by dynamical modeling. medarxiv.org (doi: 10.1101/2020.03.14.20036202) (2020)
26. Petropoulos, F., Makridakis, S.: Forecasting the novel coronavirus covid-19. *PLoS one* **15**(3), e0231236 (2020)

27. Ranjan, R.: Temporal Dynamics of COVID-19 Outbreak and Future Projections: A Data-Driven Approach. Transactions of the Indian National Academy of Engineering (2020). DOI 10.1007/s41403-020-00112-y. URL <https://doi.org/10.1007/s41403-020-00112-y>
28. Rawaf, S., Yamamoto, H.Q., Rawaf, D.: Unlocking towns and cities: Covid-19 exit strategy. East Mediterr Health J **26**(5), 499–502 (2020)
29. Sardar, T., Nadim, S.S., Chattopadhyay, J.: Assessment of 21 days lockdown effect in some states and overall india: a predictive mathematical study on covid-19 outbreak. arXiv preprint arXiv:2004.03487 (2020)
30. Schüttler, J., Schlickeiser, R., Schlickeiser, F., Kröger, M.: Covid-19 Predictions Using a Gauss Model, Based on Data from April 2. preprints.org (2020)
31. Sharma, V.K., Nigam, U.: Modeling and forecasting for covid-19 growth curve in india. medRxiv (2020). DOI 10.1101/2020.05.20.20107540. URL <https://www.medrxiv.org/content/early/2020/05/28/2020.05.20.20107540>
32. Shayak, B., Rand, R.H.: Self-burnout - a new path to the end of covid-19. medrxiv.org (doi:10.1101/2020.04.17.20069443) (2020)
33. Singhal, T.: A review of coronavirus disease-2019 (covid-19). The Indian Journal of Pediatrics pp. 1–6 (2020)
34. Tiwari, A.: Modelling and analysis of covid-19 epidemic in india. medRxiv (2020). DOI 10.1101/2020.04.12.20062794. URL <https://www.medrxiv.org/content/early/2020/04/21/2020.04.12.20062794>
35. Tomar, A., Gupta, N.: Prediction for the spread of covid-19 in india and effectiveness of preventive measures. Science of The Total Environment p. 138762 (2020)
36. Verma, M.K., Asad, A., Chatterjee, S.: Covid-19 pandemic: Power law spread and flattening of the curve. Transactions of the Indian National Academy of Engineering (2020). DOI 10.1007/s41403-020-00104-y. URL <https://doi.org/10.1007/s41403-020-00104-y>
37. Walker, P., Whittaker, C., Watson, O., Baguelin, M., Ainslie, K., Bhatia, S., Bhatt, S., Boonyasiri, A., Boyd, O., Cattarino, L., et al.: Report 12: The global impact of covid-19 and strategies for mitigation and suppression (2020)
38. World Health Organization Situation Report as on 25th June 2020: URL <https://www.who.int/docs/default-source/coronaviruse/situation-reports>
